# Supplementary material for: CO2 Laser-Based Rapid Prototyping of Micropumps
Source: MDPI journal article supplement (doi:10.3390/mi9050215), 2018-05-03
Supplement: s1 [file s1]

375  $\mu\text{m}$

257  $\mu\text{m}$

— 210  $\mu\text{m}$

— 351  $\mu\text{m}$
