# Supplementary material for: CO2 Laser-Based Rapid Prototyping of Micropumps
Source: MDPI journal article supplement (doi:10.3390/mi9050215), 2018-05-03
Supplement: s1 [file s1]

A dark blue outline of a house with a gabled roof and a chimney on the left side. The letters 'MDPI' are centered within the house's footprint.

**MDPI**
