# Supplementary figures and images for: CO2 Laser-Based Rapid Prototyping of Micropumps
Source: MDPI journal article supplement (doi:10.3390/mi9050215), 2018-05-03

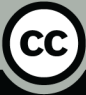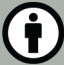

BY

Supplement: s1 [file s1]

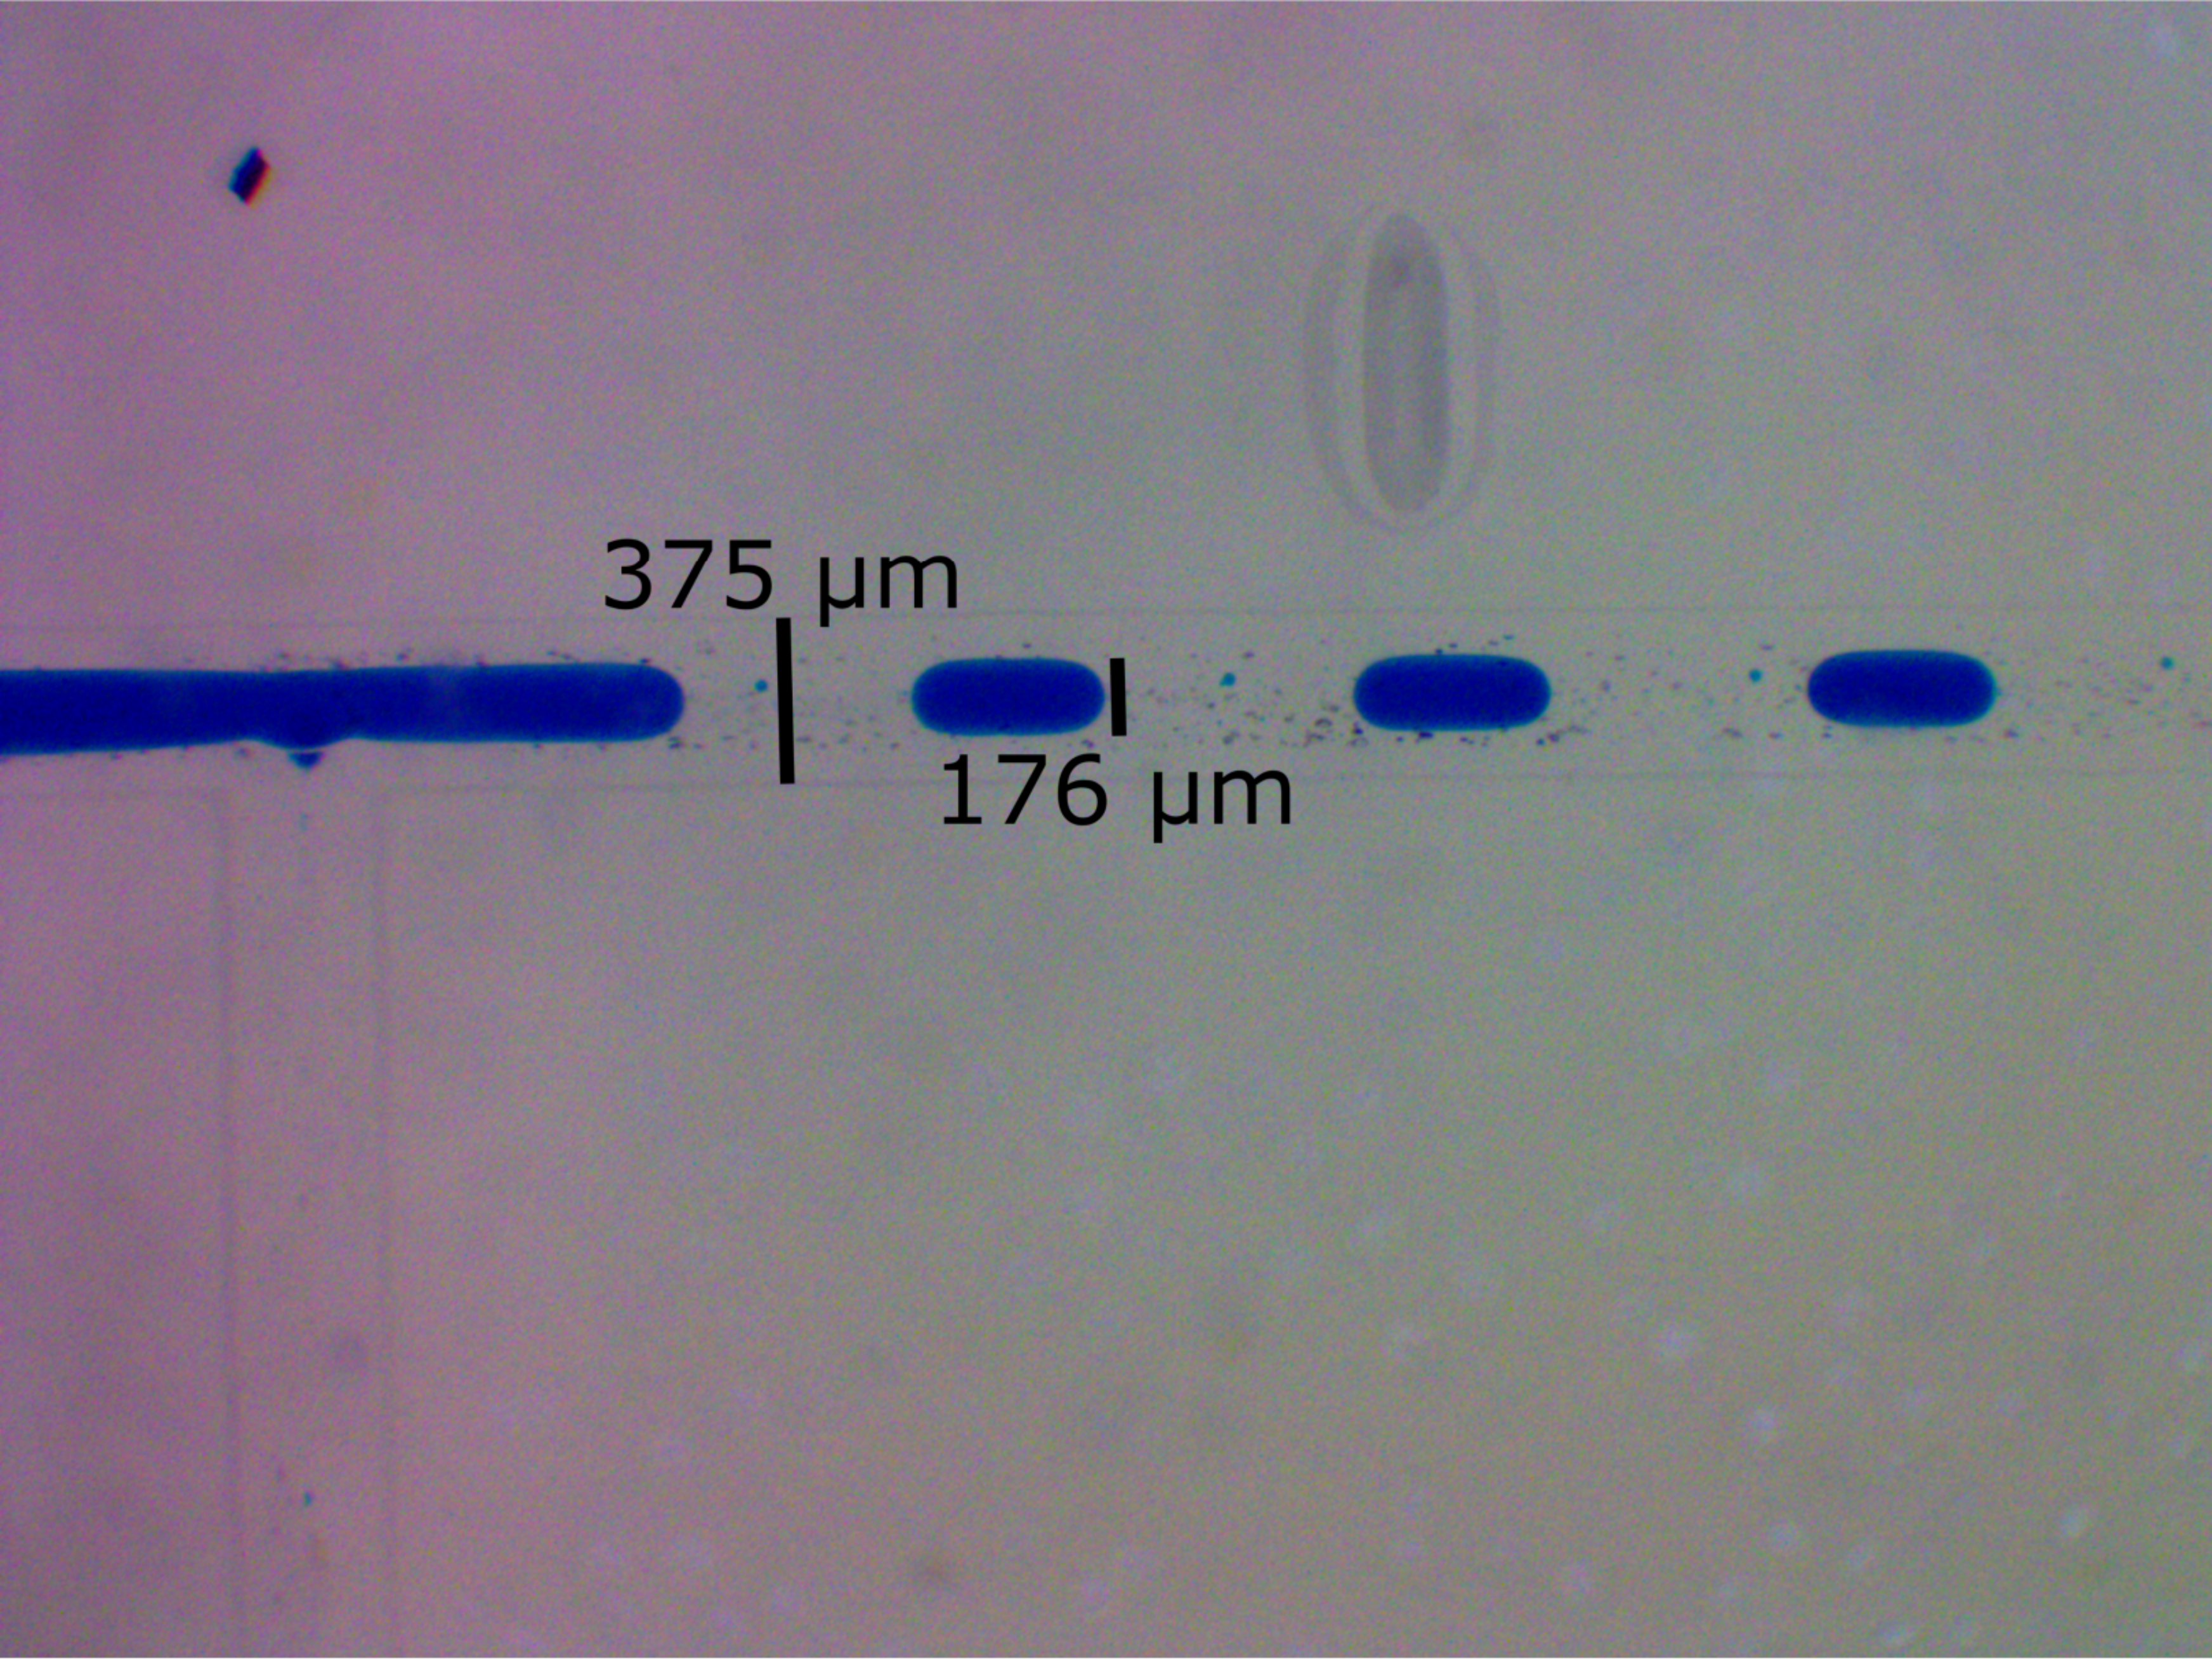

375 μm

176 μm

Supplement: s1 [file s1]
